# Supplementary material for: Continuous Flow Synthesis of Propofol
Source: MDPI journal article supplement (doi:10.3390/molecules26237183), 2021-11-26

# Continuous Flow Synthesis of Propofol

Romain Mougeot, Philippe Jubault \*, Julien Legros \*, Thomas Poisson \*

*Normandie Univ., INSA Rouen*

*UNIROUEN, CNRS, COBRA (UMR 6014) 76000 Rouen, (France).*

## SUPPORTING INFORMATION

Table of contents

1. General methods
2. Synthetic procedures
3. Characterizations

## 1. General methods

All materials were purchased from commercial suppliers. Unless specified otherwise, all reagents and solvents were used as supplied.  $^1\text{H}$  NMR spectra and  $^{13}\text{C}$  NMR spectra were recorded on a Bruker Advance III 300 at 300 MHz and 76 MHz, respectively. Residual solvent peaks were used as the reference. Data for  $^1\text{H}$  are reported as follows: chemical shift ( $\delta$  ppm), multiplicity (s = singlet, d = doublet, t = triplet, q = quartet, quint = quintet, sex = sextet, sept = septet, m = multiplet), coupling constant (Hz) and integration). Chemical shifts are reported in ppm relative to the signals corresponding to residual non-deuterated ( $\text{CDCl}_3$ :  $\delta$  = 7.26 ppm). Analyses were performed on GC-FID thermoscientific trace 1310 equipped with Durabond DB-5MS (30 m, 0.250 mm  $\varnothing$  narrowbore, 0.25  $\mu\text{m}$  film), the He vector gas flow rate of 1ml.min<sup>-1</sup> in split mode (50mL.min<sup>-1</sup>) and the inlet injector temperature of 250 °C. As FID detector, the air flow rate is at 350 mL.min<sup>-1</sup> with vector gas at 35 mL.min<sup>-1</sup>. Samples analysis were done, after 2 minutes at 50 °C, at a temperature rate of 10 °C.min<sup>-1</sup> for 20 minutes reaching 250 °C. All GC-sample were prepared using grade HPLC solvents from Fischer. Distillation were performed on a Büchi Kugelrohr. The flow reactor system is specified for each cases between the AFR™ Corning® module pump device, the Vapourtec® R4 heated system and R2S pump system.

## 2. Synthetic procedures

### a) Preparation of 3,5-diisopropyl-4-hydroxybenzoic acid (**2**)

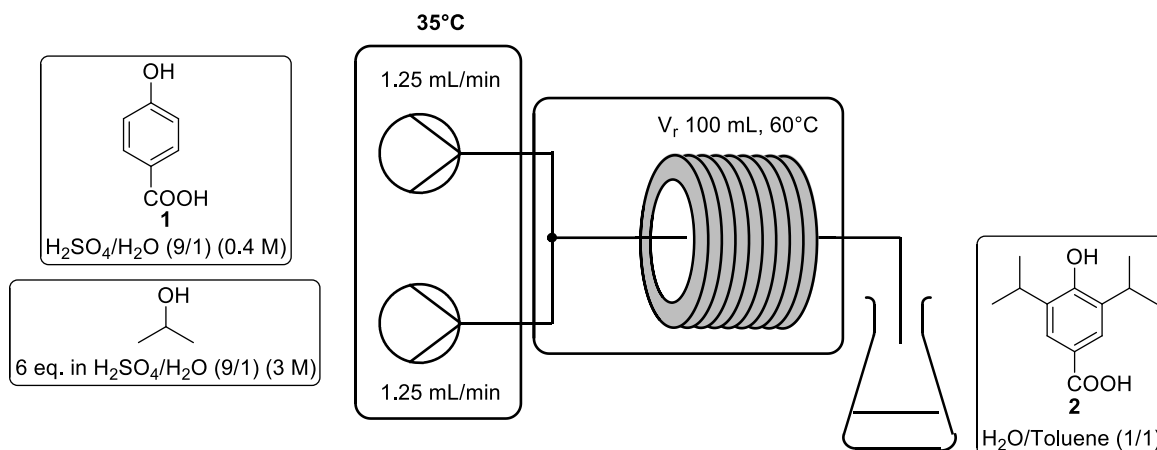

PFA reactor and channels, 1,6mmØ, AFR Corning pump module, T shape mixer, elution system H<sub>2</sub>SO<sub>4</sub>/H<sub>2</sub>O (9/1)

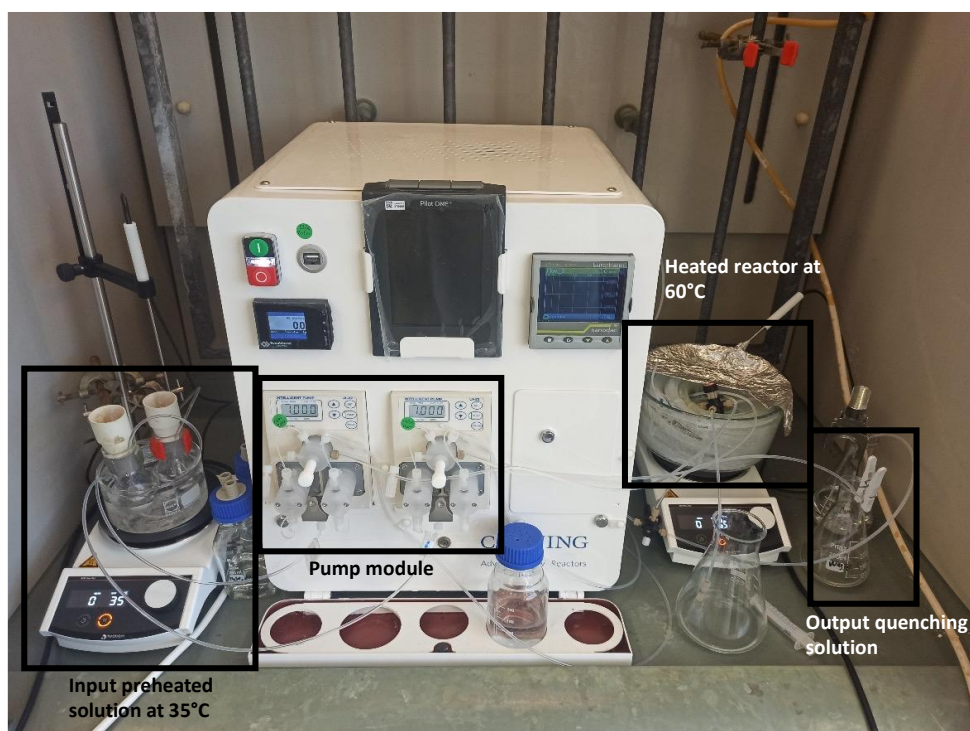

A stock solution of 4-hydroxybenzoic acid (**1**) (200 mmol, 27.6 g) in H<sub>2</sub>SO<sub>4</sub>/H<sub>2</sub>O (9:1, 440 mL/55 mL, 0.5 M) and a stock solution of isopropyl alcohol (6 eq., 1.2 mol, 71.5 g, 91.3 mL) in H<sub>2</sub>SO<sub>4</sub>/H<sub>2</sub>O (9:1, 363 mL/40.7 mL) were heated at 35°C and pumped using the AFR™ Corning® module pump at a flow rate of 1.25 mL·min<sup>-1</sup> for each solution through a T-mixer heated at 60 °C and a 100 mL coil PFA reactor also heated at 60 °C. The output of the reactor was collected into a stirred solution of H<sub>2</sub>O/toluene (1:1) at room temperature. The setup was eluted by a solution of H<sub>2</sub>SO<sub>4</sub>/H<sub>2</sub>O (9:1). The layers were separated and the aqueous phase was extracted with toluene. The combined organics phases were washed with brine, dried with MgSO<sub>4</sub> and concentrated under vacuum. Flash chromatography afforded the desired product **2** as a white solid (84%, 168 mmol, 37.3 g).

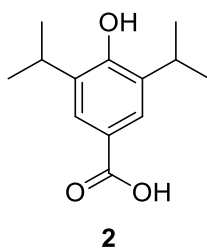

**3,5-diisopropyl-4-hydroxybenzoic acid (2):**  $^1\text{H}$  NMR (300 MHz, Chloroform-*d*)  $\delta$  7.87 (s, 2H), 3.17 (hept,  $J = 6.9$  Hz, 2H), 1.31 (d,  $J = 6.9$  Hz, 12H).  $^{13}\text{C}$  NMR (75 MHz, Chloroform-*d*)  $\delta$  172.64, 155.15, 133.73, 126.50, 121.47, 27.22, 22.60. Melting point: 139-142°C. GC retention time: 19.02 minutes. Data were in accordance with those in literature.<sup>1</sup>

---

<sup>1</sup> Pramanik, C.; Kotharkar, S.; Patil, P.; Gotrane, D.; More, Y.; Borhade, A.; Chaugule, B.; Khaladkar, T.; Neelakandan, K.; Chaudhari, A.; Kulkarni, M. G.; Tripathy, N. K.; Gurjar, M. K. *Org. Process Res. Dev.* **2014**, *18*, 152–156.

b) Preparation of Propofol

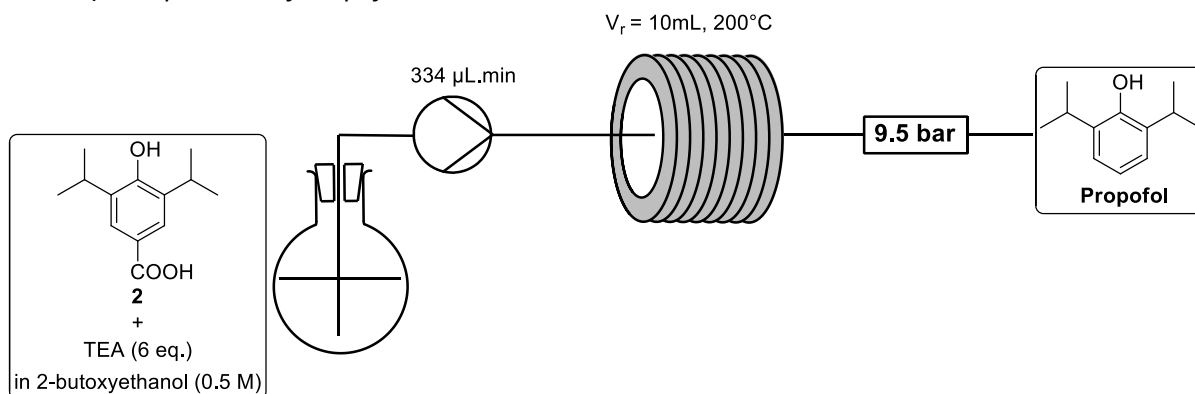

PFA channel, copper reactor, 1mmØ, Vapourtec R4 and R2S

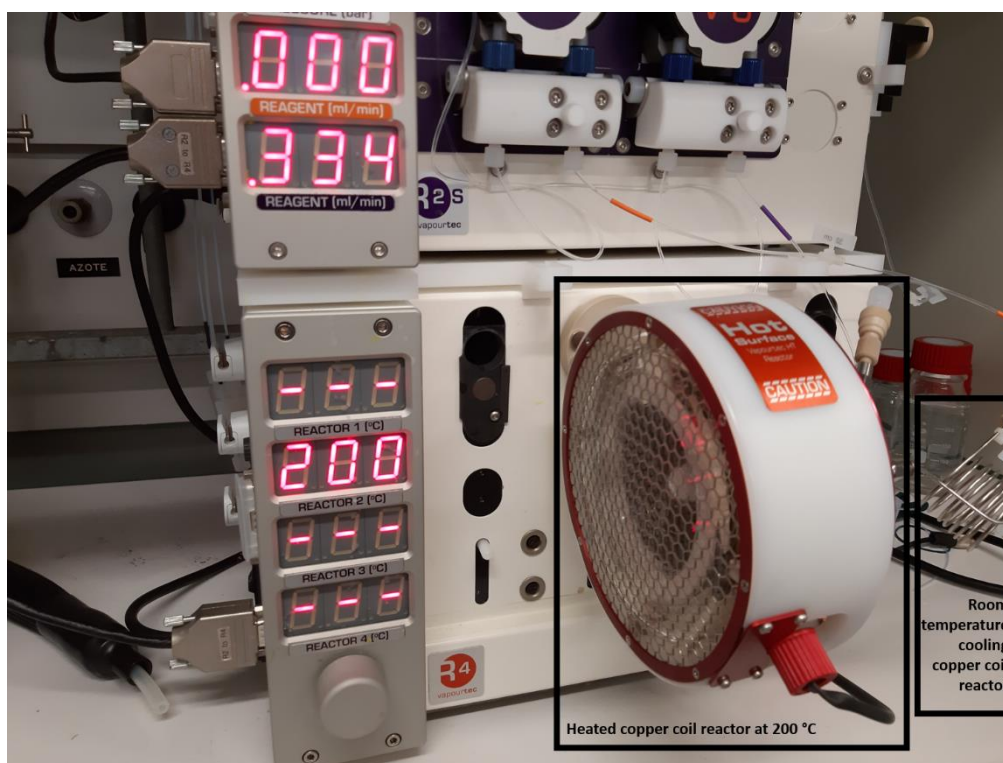

To a stock solution of 3,5-diisopropyl-4-hydroxybenzoic acid (**2**) (0.5 mmol, 111 mg, 1 eq.) in 2-butoxyethanol (500 µL) was added triethylamine (3 mmol, 500 µL, 6eq.). The mixture was stirred at room temperature and pumped by R2S Vapourtec® pump device at a flow rate of  $334 \mu\text{L}.\text{min}^{-1}$  through a 10 mL copper coil reactor at 200 °C and a 1 mL copper coil reactor at room temperature. The setup was eluted by 2-butoxyethanol. The output of the reactor was collected into a stirred solution of brine/cyclohexane. The organic layer was dried with  $\text{MgSO}_4$  and concentrated under vacuum to afford the crude Propofol with an excellent purity. A subsequent bulb to bulb distillation of this residue (140°C, 5 mbar) is possible to further purify the Propofol, which is obtained as a colourless liquid. (58% yield)

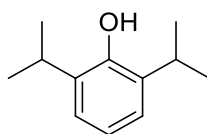

**Propofol**

**Propofol:**  $^1\text{H}$  NMR (300 MHz, Chloroform-*d*)  $\delta$  7.07 (dd,  $J = 7.6, 0.5$  Hz, 2H), 6.96 – 6.85 (m, 1H), 4.78 (s, 1H), 3.17 (hept,  $J = 6.8$  Hz, 2H), 1.28 (d,  $J = 6.9$  Hz, 12H).  $^{13}\text{C}$  NMR (75 MHz, Chloroform-*d*)  $\delta$  149.97, 133.66, 123.48, 120.66, 27.18, 22.78. GC retention time: 13.70 minutes. Data were in accordance with those in literature.<sup>1</sup>

### 3. Characterizations

#### $^1\text{H}$ NMR spectra of **2**

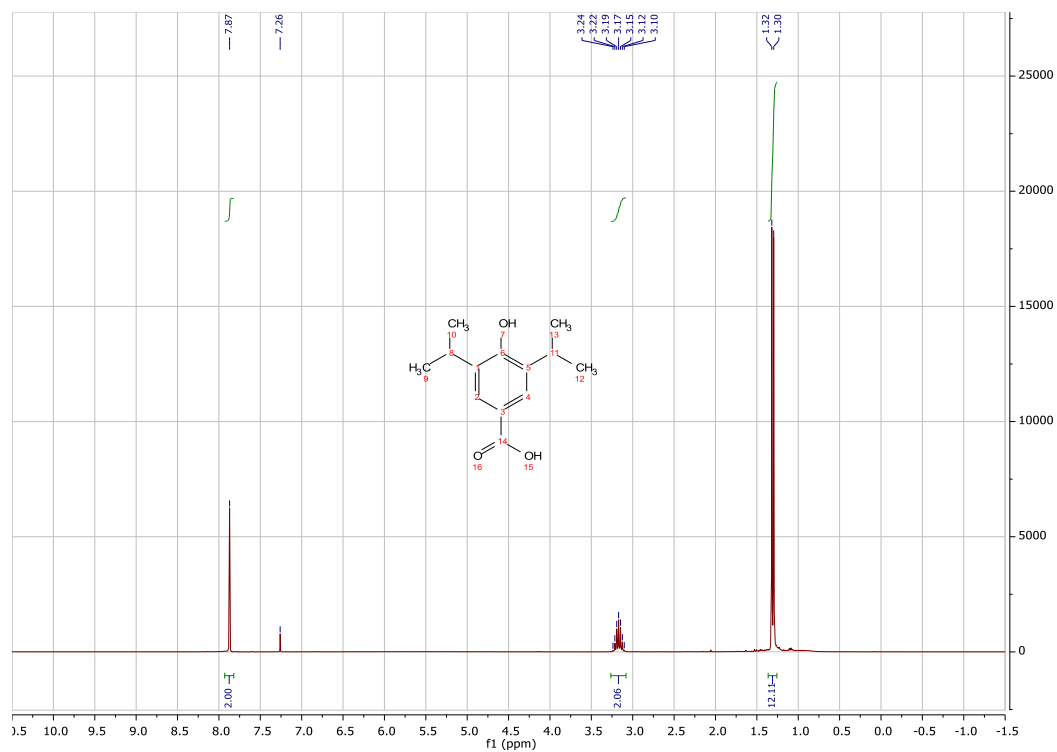

#### $^{13}\text{C}$ NMR spectra of **2**

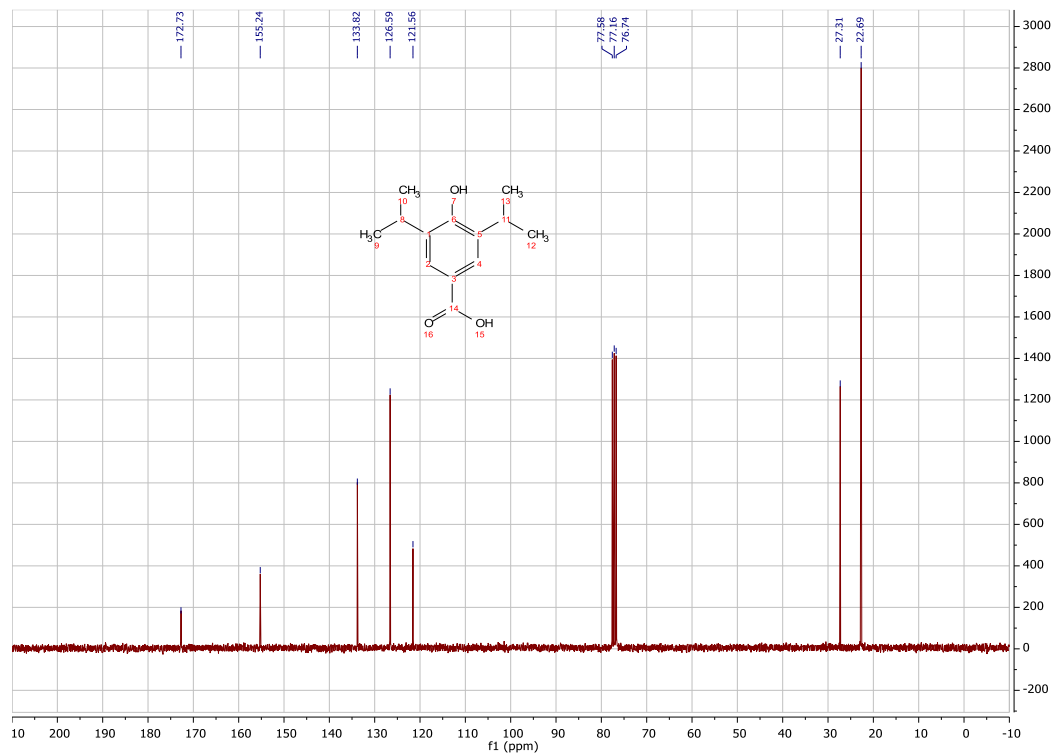

GC chromatograph of **2**

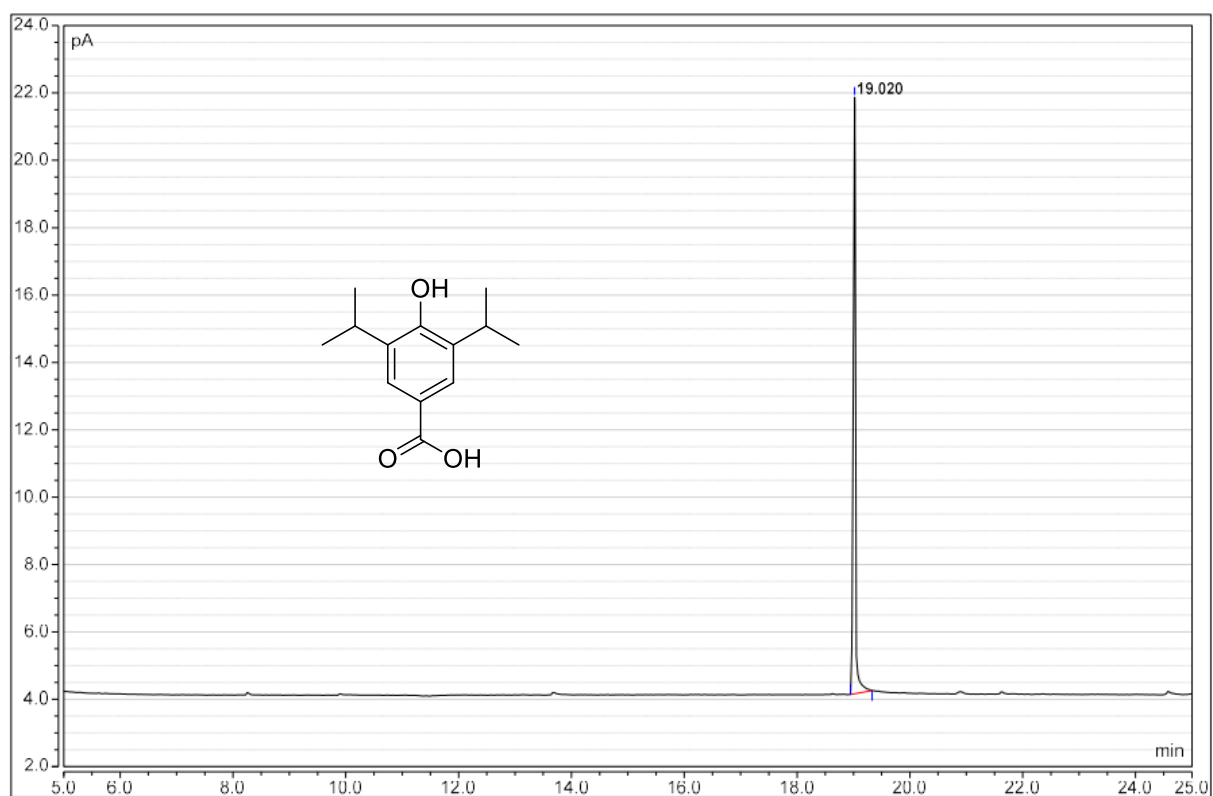



# <sup>1</sup>H NMR spectra of propofol

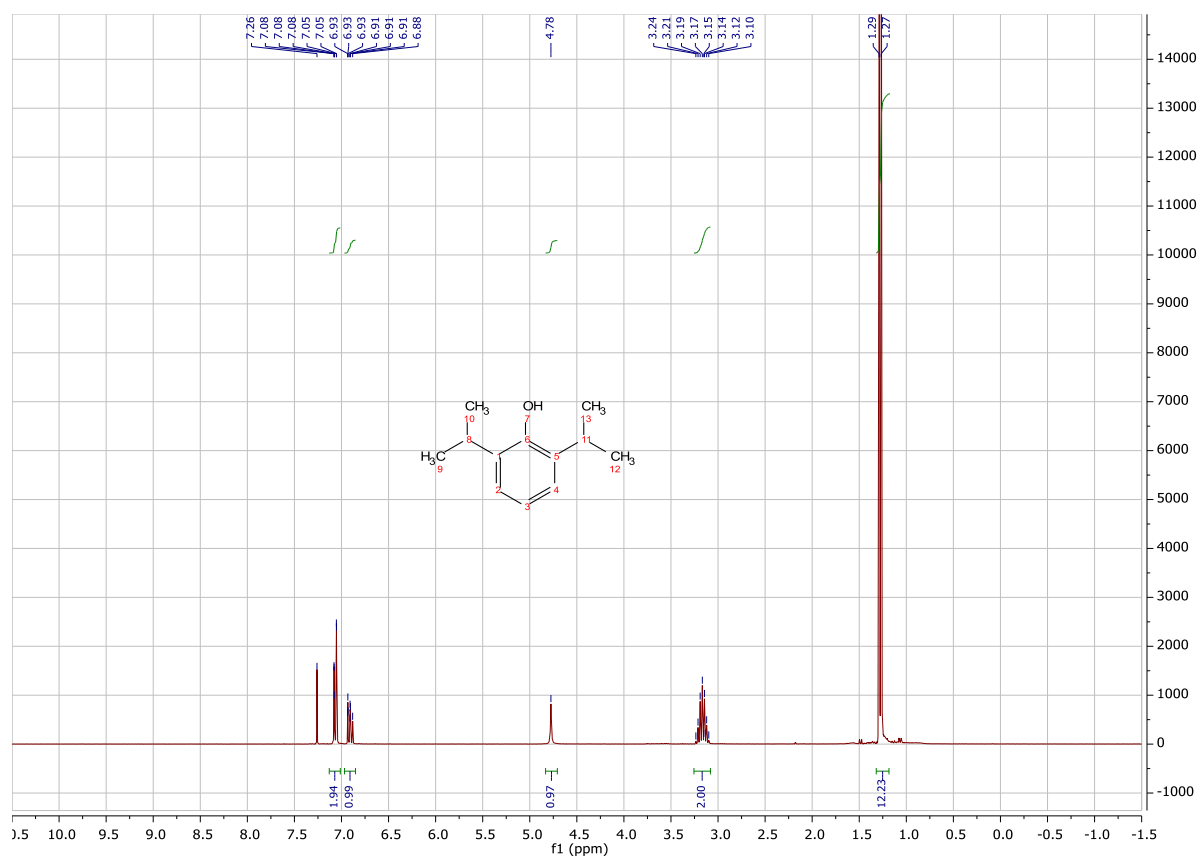

## <sup>13</sup>C NMR spectra of propofol

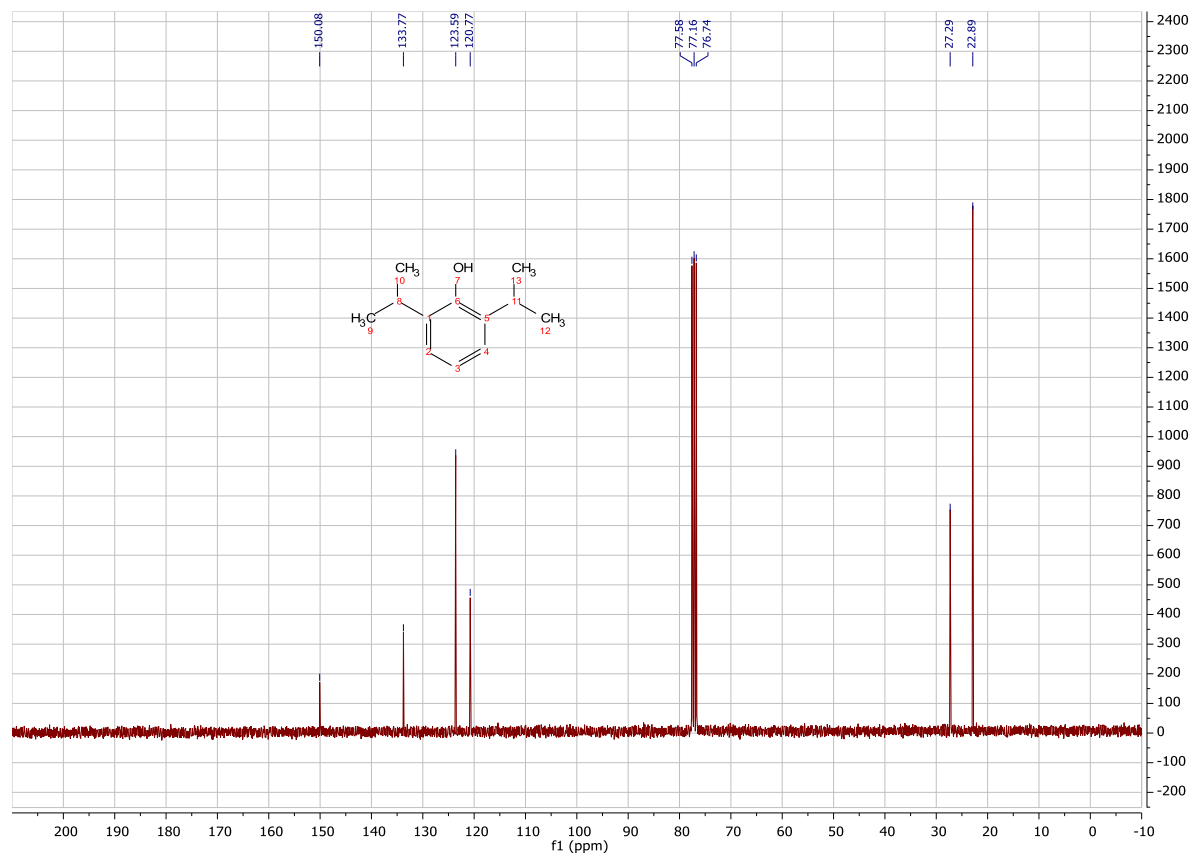

GC chromatograph of **propofol**

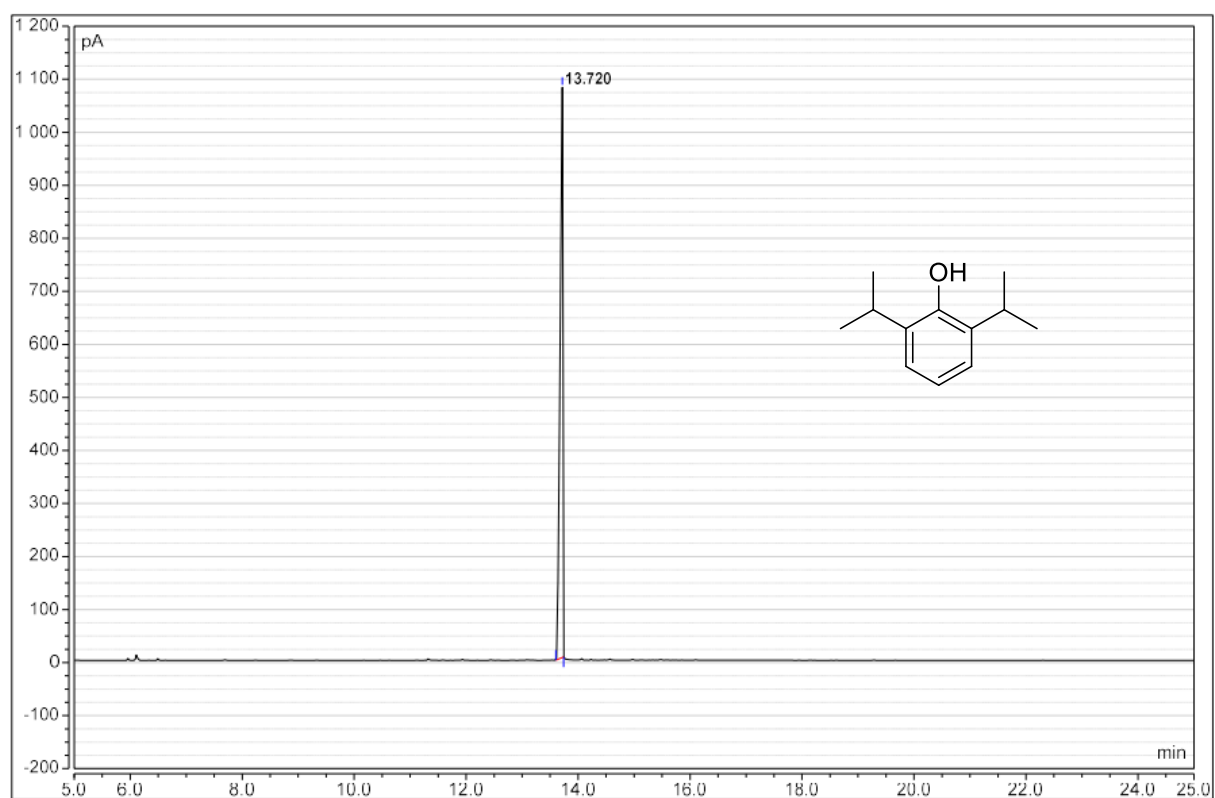

GC chromatograph of crude mixture of **propofol**

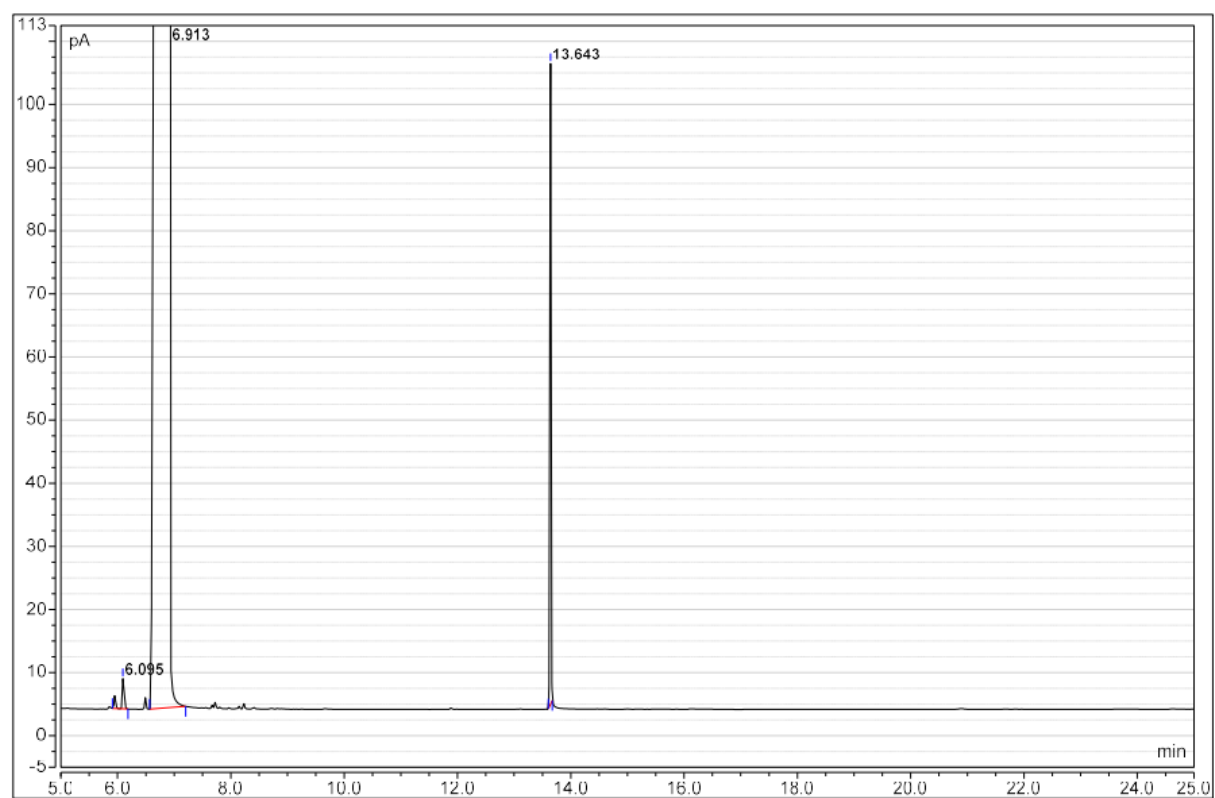

Supplement: s1 [file s1]
